# Supplementary material for: Cross-Sectional Research Into People Passing Away Through Self-Ingesting Self-Collected Lethal Medication After Receiving Demedicalized Assistance in Suicide
Source: PubMed Central journal article supplement — Omega (Westport). 2020 Jun 2;84(4):1100–21. doi: 10.1177/0030222820926771 (PMC8848061; doi:10.1177/0030222820926771), 2020-06-02
Supplement: sj-pdf-1-ome-10.1177_0030222820926771.pdf [file sj-pdf-1-ome-10.1177_0030222820926771.pdf]

## Additional File 1: Appendix registration form 2015

| Item                                                                     | Selected option                                                                                                                                                                                                                                                                                                                                                                          |
|--------------------------------------------------------------------------|------------------------------------------------------------------------------------------------------------------------------------------------------------------------------------------------------------------------------------------------------------------------------------------------------------------------------------------------------------------------------------------|
| 1. Personal characteristics of the client                                |                                                                                                                                                                                                                                                                                                                                                                                          |
| Postal Code                                                              | 4 digits of Dutch postal code<br>Name of country, if abroad<br>Unknown                                                                                                                                                                                                                                                                                                                   |
| Gender                                                                   | Male<br>Female<br>Unknown                                                                                                                                                                                                                                                                                                                                                                |
| Year of birth                                                            | 4 digits<br>Unknown                                                                                                                                                                                                                                                                                                                                                                      |
| 2. Overview of the situation of the client prior to start of counselling |                                                                                                                                                                                                                                                                                                                                                                                          |
| Current disease(s), diagnosis or situation                               | Open-ended questions. More than one answer possible.<br>Several examples preselected:<br>Physical: E.g. cancer, problems of old age, dementia, heart problems.<br>Psychiatric: E.g. depression, personality disorders, fear disorder.<br>Psychological: E.g. existential suffering, loneliness, youth trauma.<br>No current suffering: E.g. wanting autonomy, completed life.<br>Unknown |
| Main motivation to request counselling                                   | Physical suffering<br>Psychiatric suffering<br>Psychological suffering<br>No suffering at present<br>Unknown                                                                                                                                                                                                                                                                             |
| Severity of disease                                                      | Terminal disease<br>Severe disease<br>No severe disease<br>No disease/not applicable<br>Unknown                                                                                                                                                                                                                                                                                          |
| Presence and urgency of death wish at start of counselling               | No death wish present<br>Death wish present, wants to end life within three months<br>Death wish present, wants to end life between 3 to 12 months<br>Death wish present, wants to end life more than one year away<br>Unknown                                                                                                                                                           |
| Request for assistance in dying to a physician                           | No request for PAD<br>Request for PAD denied<br>Request for PAD pending<br>Request for PAD granted<br>Unknown                                                                                                                                                                                                                                                                            |
| Situation of request for assistance in dying to a physician:             | Not applicable<br>Request for PAD for current situation<br>Request for PAD for future situation<br>Unknown                                                                                                                                                                                                                                                                               |
| Moment of request for assistance in dying to a physician                 | Not applicable<br>Request for PAD before start counselling<br>Request for PAD before and during counselling<br>Request for PAD during counselling<br>Unknown                                                                                                                                                                                                                             |
| Explication on request                                                   | Open-ended question. More than one answer possible.<br>Several examples preselected:<br>No request: E.g. staying autonomous, not wanting to burden the physician.<br>Request denied: E.g. not meeting legal criteria of due care.<br>Request pending: E.g. physician has to think about it<br>Request granted: E.g. granted for near future, granted for in due time.<br>Unknown         |

|                                                                                           |                                                                                                                                                         |
|-------------------------------------------------------------------------------------------|---------------------------------------------------------------------------------------------------------------------------------------------------------|
|                                                                                           | Not applicable                                                                                                                                          |
| Prior suicide attempt                                                                     | Yes<br>No<br>Unknown                                                                                                                                    |
| Prior sought help at other organisation or caregivers related to current request for help | No<br>Yes, at physician<br>Yes, at psychiatrist<br>Yes, at Right to Die Netherlands / SVL<br>Yes, at End-of-Life Clinic<br>Yes, at other ...<br>Unknown |
| 3a. Characteristics of the counselling process (number of contacts)                       |                                                                                                                                                         |
| Number of face-to-face contacts in 2012                                                   | Any number<br>Unknown                                                                                                                                   |
| Number of other contacts in 2012                                                          | Any number<br>Unknown                                                                                                                                   |
| Total number of contacts in 2012                                                          | Calculated automatically from two prior columns                                                                                                         |
| Month of first contact                                                                    | Jan – Dec<br>Unknown                                                                                                                                    |
| Year of first contact                                                                     | 1995 – 2015<br>Unknown                                                                                                                                  |
| Number of face-to-face contacts since start of counselling                                | Any number<br>Unknown                                                                                                                                   |
| Number of other contacts since start of counselling                                       | Any number<br>Unknown                                                                                                                                   |
| Total number of contacts since start of counselling                                       | Calculated automatically from two prior columns                                                                                                         |
| 3b. Characteristics of the counselling process (content)                                  |                                                                                                                                                         |
| Content: Moral support                                                                    | Yes<br>No                                                                                                                                               |
| Content: General information                                                              | Yes<br>No                                                                                                                                               |
| Content: Mental preparation / decision making                                             | Yes<br>No                                                                                                                                               |
| Content: PAD                                                                              | Yes<br>No                                                                                                                                               |
| Content: Practical preparation information methods                                        | Yes<br>No                                                                                                                                               |
| Content: Practical preparation performance methods                                        | Yes<br>No                                                                                                                                               |
| Content: Close ones                                                                       | Yes<br>No                                                                                                                                               |
| Content: Juridical information                                                            | Yes<br>No                                                                                                                                               |
| Status of counselling                                                                     | Counselling on-going<br>Counselling (ready) on hold<br>Referral to ...<br>Passed away through..                                                         |

|                                                                   |                                                                                                                                                                                                      |
|-------------------------------------------------------------------|------------------------------------------------------------------------------------------------------------------------------------------------------------------------------------------------------|
| 3c. Characteristics of the counselling process (counselee system) |                                                                                                                                                                                                      |
| Involvement of others during counselling                          | Yes<br>No                                                                                                                                                                                            |
| Reason for no others involved                                     | Open-ended question.<br>Several examples preselected:<br>No social network/Alone<br>Fear of reactions<br>Regarded as a private matter<br>Unknown<br>Not applicable                                   |
| Relationship of others involved                                   | Open-ended question. More than one answer possible.<br>Several examples preselected:<br>E.g. partner, (grand)child(ren), parents, siblings, friends.<br>Not applicable                               |
| Number of others involved                                         | Any number<br>Not applicable                                                                                                                                                                         |
| Attitude of involved others                                       | Positive/Supportive<br>Negative/Critical<br>Mixed/Ambiguous<br>Unknown<br>Not applicable                                                                                                             |
| Openness about counselling towards others                         | Yes<br>No<br>Unknown                                                                                                                                                                                 |
| Reason for no openness towards others                             | Open-ended question.<br>Several examples preselected:<br>No social network/Alone<br>Fear of reactions<br>Regarded as a private matter<br>Unknown<br>Not applicable                                   |
| Relationship of other towards whom clients is open                | Open-ended question. More than one answer possible.<br>Several examples preselected:<br>E.g. partner, (grand)child(ren), parents, siblings, friends.<br>Not applicable                               |
| Number of other towards whom client is open                       | Any number<br>Unknown<br>Not applicable                                                                                                                                                              |
| Attitude of others towards whom client is open                    | Positive/Supportive<br>Negative/Critical<br>Mixed/Ambiguous<br>Unknown<br>Not applicable                                                                                                             |
| 4. Outcome of the counselling process                             |                                                                                                                                                                                                      |
| See also status of counselling at 3b.                             | See also character of counselling at 3.                                                                                                                                                              |
| Manner of death, if client deceased.                              | Not deceased<br>Unknown if deceased<br>Natural death<br>Physician-assisted dying<br>Lethal medication<br>Voluntary refusing food and fluid<br>Helium<br>Dignitas<br>Hanging/Choking<br>Jumping train |

|                                                   |                                                       |
|---------------------------------------------------|-------------------------------------------------------|
|                                                   | Jumping height<br>Drowning<br>Unknown manner of death |
| When deceased: month                              | Jan – Dec<br>Unknown<br>Not applicable                |
| When deceased: year                               | 2011 - 2016<br>Not applicable                         |
| Follow up counselling with bereaved ones          | Yes<br>No                                             |
| Other information on follow up counselling        | Open- ended question.                                 |
| 5. Other                                          |                                                       |
| Additional remarks about whatever deemed relevant | Open-ended question                                   |
